# Supplementary material for: Even good bots fight: The case of Wikipedia
Source: PubMed Central journal article supplement (PMC5322977; doi:10.1371/journal.pone.0171774), 2017-02-23
Supplement: pone.0171774.s009.pdf [file pone.0171774.s009.pdf]

**S1 Table. Descriptive statistics for the bot-bot layer and the human-human layer in the multi-layer networks of reverts.**

|  | Number of nodes | Avg. number reverts per node | Reverts / edits | Prop. dyads with at least one revert reciprocated | Assortativity by number of edits | Avg. clustering | Avg. clustering / avg. clustering in random network |
|--|-----------------|------------------------------|-----------------|---------------------------------------------------|----------------------------------|-----------------|-----------------------------------------------------|
|--|-----------------|------------------------------|-----------------|---------------------------------------------------|----------------------------------|-----------------|-----------------------------------------------------|

**Bot-bot**

|            |     |       |       |      |       |      |    |
|------------|-----|-------|-------|------|-------|------|----|
| English    | 319 | 104.6 | 0.002 | 0.46 | -0.02 | 0.43 | 19 |
| Japanese   | 182 | 100.4 | 0.006 | 0.57 | -0.13 | 0.58 | 9  |
| Spanish    | 204 | 71.7  | 0.003 | 0.53 | -0.06 | 0.57 | 12 |
| French     | 225 | 59.3  | 0.004 | 0.47 | -0.1  | 0.5  | 12 |
| Portuguese | 164 | 185   | 0.006 | 0.57 | -0.12 | 0.64 | 8  |
| German     | 178 | 24.1  | 0.004 | 0.43 | -0.1  | 0.4  | 10 |
| Chinese    | 151 | 103   | 0.006 | 0.59 | -0.16 | 0.62 | 9  |
| Hebrew     | 124 | 83.9  | 0.006 | 0.59 | -0.11 | 0.59 | 7  |
| Hungarian  | 116 | 66.8  | 0.004 | 0.54 | -0.13 | 0.6  | 8  |
| Czech      | 122 | 59    | 0.005 | 0.57 | -0.18 | 0.56 | 8  |
| Arabic     | 132 | 161.7 | 0.011 | 0.6  | -0.05 | 0.6  | 7  |
| Romanian   | 104 | 70.8  | 0.005 | 0.55 | -0.11 | 0.6  | 7  |
| Persian    | 106 | 63.8  | 0.005 | 0.5  | -0.05 | 0.53 | 8  |

**Human-human**

|            |         |     |       |      |       |      |       |
|------------|---------|-----|-------|------|-------|------|-------|
| English    | 4127880 | 3.1 | 0.079 | 0.09 | -0.05 | 0.04 | 72370 |
| Japanese   | 193203  | 2.6 | 0.026 | 0.16 | -0.05 | 0.02 | 2971  |
| Spanish    | 508815  | 2.3 | 0.070 | 0.09 | -0.11 | 0.1  | 33433 |
| French     | 181395  | 2.6 | 0.045 | 0.09 | -0.02 | 0.04 | 4011  |
| Portuguese | 262293  | 2.3 | 0.066 | 0.09 | -0.14 | 0.12 | 19762 |
| German     | 206734  | 2.2 | 0.069 | 0.11 | -0.1  | 0.03 | 3703  |
| Chinese    | 66470   | 3.2 | 0.028 | 0.18 | -0.14 | 0.08 | 3377  |
| Hebrew     | 70816   | 2.9 | 0.047 | 0.13 | -0.13 | 0.2  | 7458  |
| Hungarian  | 21036   | 2.4 | 0.016 | 0.11 | -0.13 | 0.1  | 1265  |
| Czech      | 23792   | 3.1 | 0.035 | 0.1  | -0.18 | 0.19 | 2262  |
| Arabic     | 39083   | 2.2 | 0.044 | 0.08 | -0.17 | 0.11 | 2947  |
| Romanian   | 16625   | 2.1 | 0.027 | 0.1  | -0.2  | 0.11 | 1371  |
| Persian    | 18657   | 3.6 | 0.056 | 0.16 | -0.13 | 0.21 | 1972  |

Bots revert each other to a great extent. They also reciprocate each other's reverts to a considerable extent. Their interactions are not as clustered as for human editors. Still, both for bots and humans, more senior editors tend to revert less senior editors, as measured by node assortativity by number of edits completed.
